# Supplementary material for: Bimetallic Pd(ii)/Fe(ii)-mediated self-assembly of three-dimensional hybrid multilayers with a terpyridine-contained poly(vinylpyridine) derivative as a linker on substrate surface
Source: Royal Society of Chemistry journal article supplement (doi:10.1039/c1ra00526j), 2011-11-03
Supplement: c1ra00526j.pdf [file c1ra00526j.pdf]

# **Bimetallic Pd(II)/Fe(II)-Mediated Self-Assembly of Three-Dimensional Hybrid Multilayers with a Terpyridine-Contained Poly(vinylpyridine) Derivative as a Linker on Substrate Surface**

**Jiang Liu, An Liu, Meng Chen, and Dong-Jin Qian,\***

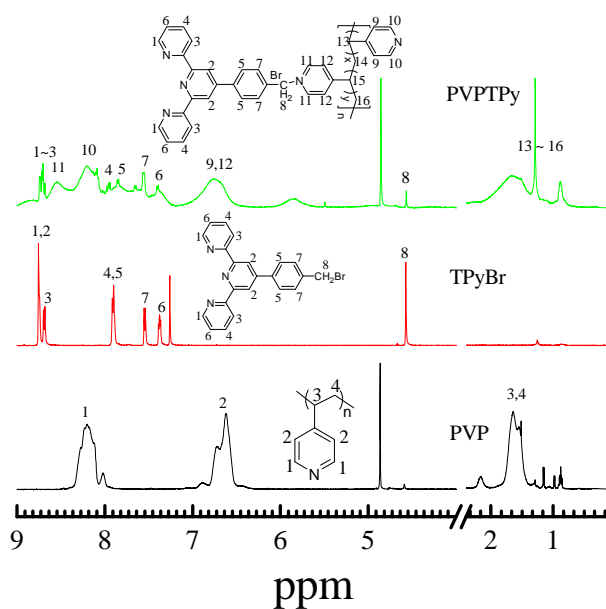

Figure S1.  $^1\text{H}$  NMR spectra of PVP, TPyBr and PVPTPy.

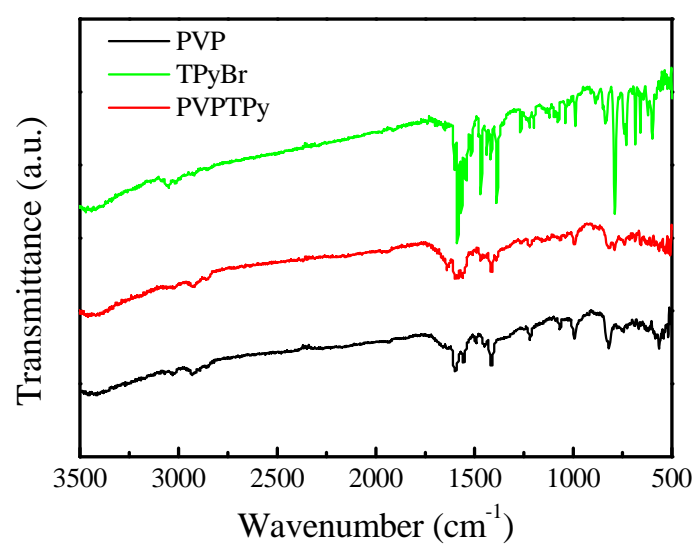

Figure S2. FTIR spectra of (a) TPyBr, (b) PVP and (c) PVPTPy.

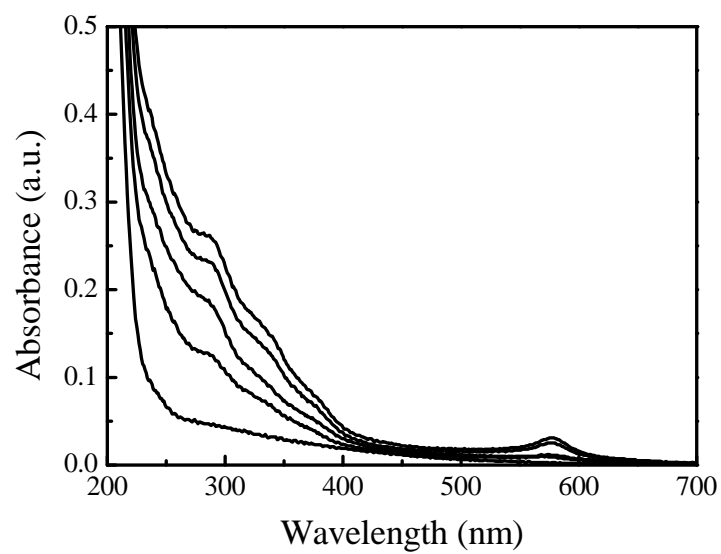

Figure S3. Absorption spectra for the (Pd)Fe-PVPTPy multilayers on the quartz substrate surface (**E**, Scheme 2). From bottom to up: BPy-Pd modified quartz, BPy-Pd-PVPTPy, and then one to three layers of (BPy-Pd)/(Fe-PVPTPy)<sub>1~3</sub> multilayers.

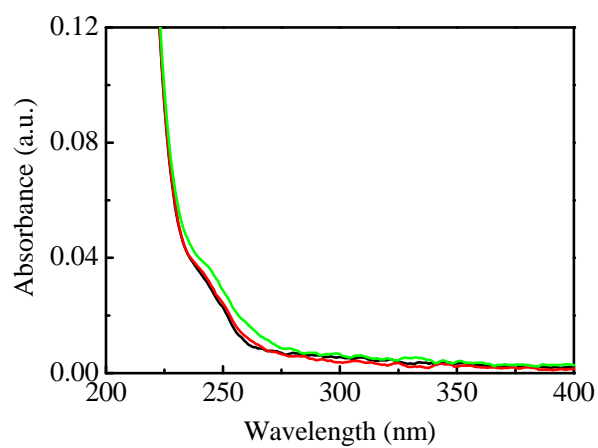

Figure S4. Absorption spectra for the LBL assembly of Fe-PVP. Black line, the quartz plate covered by one layer of PVP (denoted as Q-PVP); Red line, Q-PVP covered by the first deposition of Fe/PVP layer; Green line, Q-PVP covered by twice deposition of Fe/PVP layer.

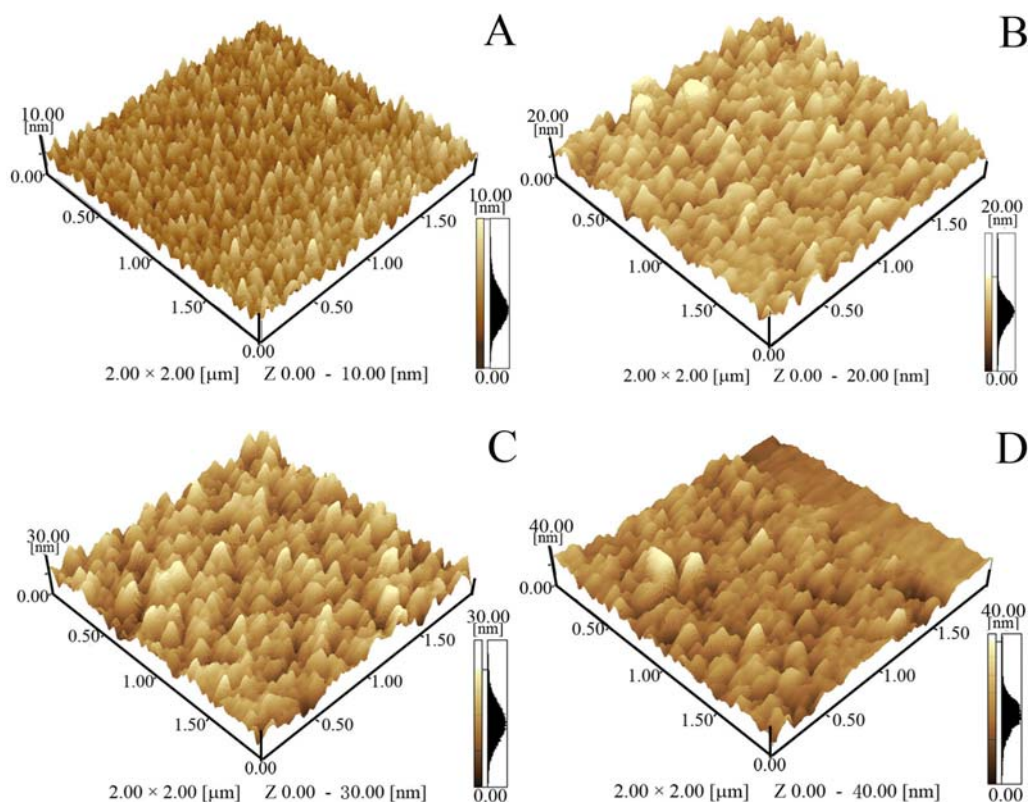

Figure S5. AFM images for the gold substrates covered by (A) the initial layer of PySH, denoted as AuSPy, as well as the LBL multilayers of (B) AuSPy(Pd/Fe-PVPTPy), (C) AuSPy(Pd/Fe-PVPTPy)<sub>3</sub>, and (D) AuSPy(Pd/Fe-PVPTPy)<sub>5</sub>.

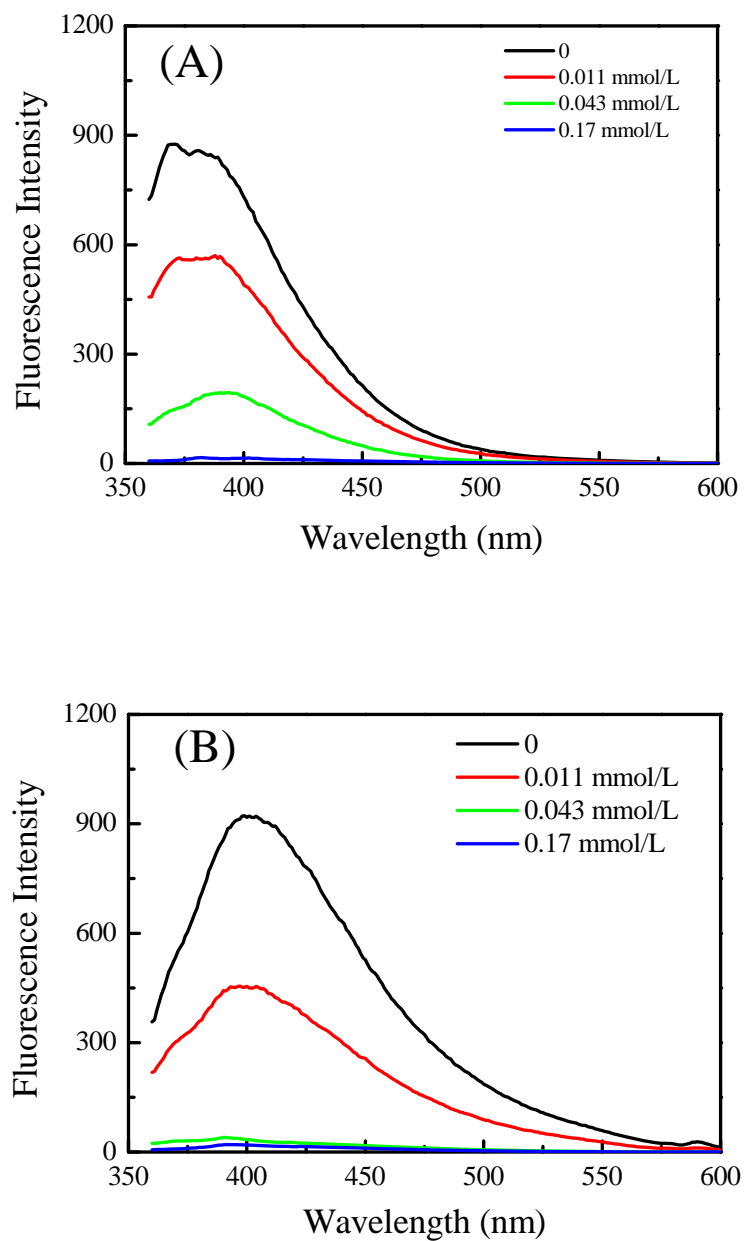

Figure S6. Emission spectra for (A) TPyBr and (B) PVPTPy in the 0.085 mmol/L methanol solutions after addition of different concentrations of  $\text{Fe}(\text{BF}_4)_2$ . Inserted: Concentration of  $\text{Fe}(\text{BF}_4)_2$  in the solutions.

**Table S1.** Deconvolution of XPS Peaks.

|                              | C(1s)             | N(1s)            | O(1s)             | Cl(2p)           | Pd(3d)                 | Fe(2p)           | B(1s)            | F(1s)            |
|------------------------------|-------------------|------------------|-------------------|------------------|------------------------|------------------|------------------|------------------|
| BPy modified<br>( <b>B</b> ) | 284.8<br>(47.28%) | 400.0<br>(1.99%) | 532.6<br>(50.49%) | 198.1<br>(0.24%) |                        |                  |                  |                  |
| Pd-PVPTPy<br>( <b>D</b> )    | 284.8<br>(53.53%) | 400.1<br>(3.69%) | 532.2<br>(39.27%) | 198.2<br>(1.88%) | 337.4,343.0<br>(1.63%) |                  |                  |                  |
| Pd/Fe-PVPTPy<br>( <b>F</b> ) | 284.8<br>(44.95%) | 400.1<br>(2.42%) | 532.3<br>(49.06%) | 197.8<br>(0.62%) | 338.0,343.4<br>(1.32%) | 708.7<br>(0.18%) | 188.0<br>(1.37%) | 685.1<br>(0.08%) |
